# Supplementary material for: Mutation of an Arabidopsis NatB N-Alpha-Terminal Acetylation Complex Component Causes Pleiotropic Developmental Defects
Source: PubMed Central journal article supplement (PMC3828409; doi:10.1371/journal.pone.0080697), 2013-11-14
Supplement: pone.0080697.s001.pdf [file pone.0080697.s001.pdf]

1<sup>st</sup> leaves

3<sup>rd</sup> leaves

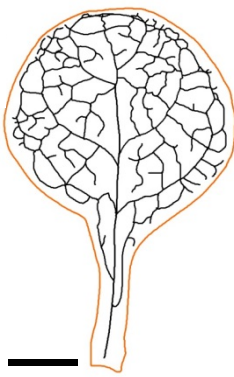

Ler

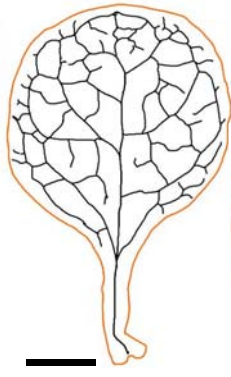

P14 6.3

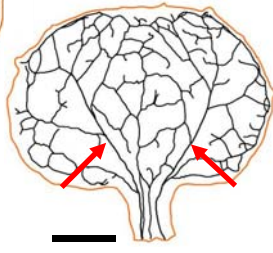

P14 6.3

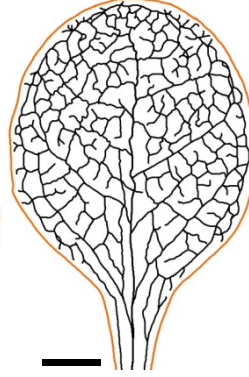

Ler

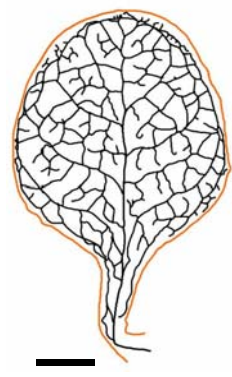

P14 6.3
