# Supplementary material for: Mutation of an Arabidopsis NatB N-Alpha-Terminal Acetylation Complex Component Causes Pleiotropic Developmental Defects
Source: PubMed Central journal article supplement (PMC3828409; doi:10.1371/journal.pone.0080697), 2013-11-14
Supplement: pone.0080697.s005.pdf [file pone.0080697.s005.pdf]

At 365 ...SHLTTEEMFDSRISSASDLVQKIQORDAENSNI RGPYLAELIEIEKRRKFLFCGKKNBDKLIIES  
 Rc 319 ...SHLADEVFDSRLSDASAFVQKLLADGNNGFIRSPYLALEIEIERRRHLYGKANDEIMEA  
 Vv 315 ...SHLTDEVFISRLSNASAFQKIQAEAGNDFIRCPYLANLEIEERRKQLOGKGD DDKLIEV  
 Pt 307 ...SQLADDVFHSRIISTSLAFVKIQADTSNDFIRCPYLATLEIEERRRLHGKGNDDDIIEA  
 Os 296 ...TSLSDDELVESRIASALS FVQKIQVNDTSDCVRGPHLASLEIEERQCRSCNPTDRKFIIEA

At 424 LLQYFLKFGHLACYASDVEAYLQVLSPNKKAGFVEMLVKNSDSSASA-TKVLGQTTITILK  
 Rc 378 LLRYFYKFGHLACCTSDIEVELQVLTPGKKMELVEKLVKSLDSLTTIPTKVLGQSIITVFK  
 Vv 374 LLQYFFRFGHLACFASDIEGFLRVLPFGKKEEFLEKIKKSCDSLSAVPTKLLGQSIISLFK  
 Pt 366 LLMLYFLKFGHLASFSSDVEAYLQVLTPDKKTEFLAKLIKTLDSASAPTKVLGQSIITIFK  
 Os 355 LLNYFHREFGHLSCAASDVEAYLHMLSSDETTELLDTISRSFD-ASSLSVKGLGLAITTFK

▲  
*tcu2-1*

At 484 VQELTGNIFGLPTDE-----IEASAVKLAKLYCONL  
 Rc 438 IQQLICNLYKLPVIG-----IEGFAKQMVEMWKSL  
 Vv 434 IEELICNMEKIPVVE-----IENSAIRMAQMYCKNL  
 Pt 426 IQELTGNMYKLPVLGACFFCFFCTHTLAHPHNLHIIQTAQPLEIEGCAVQMVEMYCKSL  
 Os 414 VQELLGTFEFSKSTTE-----IQHIAGKMVEAFYKNL

At 515 SLSKDLDPQESMFGHEELLSLISNMLVQLFWRTDFGYLAEAIMVLELGLTIRGHVWQYKI  
 Rc 469 PLSKDLDPQESMFGHEELLSMACNVLVQLFWLTRNVGYFMEAIMVLEFGLTIRPHVWQYKI  
 Vv 465 PLSKDLDPQESMFGHEELLSMACNVLVQLFWRTROLGYLLEAIMVLELGLTIRRHVWQYKI  
 Pt 486 PLSKDLDPQESMFGHEELLSMVCNVLVQLFWRTRHLYGYFIEAIMVLEFGLTIRRYVWQYKI  
 Os 445 PLSRDLDPQESMFGHELLCMASSILVQLFWRTRNLYLIEAILVLEFGLTVRKYVWQYKV

At 575 LLVHLYSYV GALPLAFERYKALDVKNILLETIVSHHILRQMLIESPMWVDLSNLLKDYLKFM  
 Rc 529 FLVHMYSHLGDLSLAYEYKFLDVKNILMETIVSHHIFPYMLPSPWVDSSNLLKNYLRFM  
 Vv 525 LLVHLYSYL GAYSLSYEWYKSLVKNILLESVSHHILPQMLVSPWVDLNDVLKDYLKFM  
 Pt 546 LLVHLYSHLGAISLAYEYKSLDVKNILMETIVSHHILPQMLVSPWGDLDNLLKDYLRFM  
 Os 505 MLVHLYSYL GALPLAHRWYVTLVKNILLESASHHILPQMLNSPLQQTADLVKDYLKFM

At 635 DDHLRESADLTFLAYRHRNYSKVIEFVLFKQRLQHSNOYQAARVEASVLQKQKADSFEE  
 Rc 589 DDHLRESADLTFLAYRHRNYSKVIEFFQFKERLQOSNOYLVARVETSHLQKQKANNIEE  
 Vv 585 DDHLKESADLTSLAYRHRNYSKVIEFVQFKERLQHSNOYLMARLEAPHLQKQLNANNIEE  
 Pt 606 DDHLRESADLTFLAYRHRNYSKVIEFVQFKERLQORSNOYLVARVETPHLQKQKADNIEE  
 Os 565 DDHLKESADLTCLAYRHRTYSKVIEFVQFKERLQHSNOYLSVRSDSIHLQKQKAEESLDE

At 695 EERILENLKSGVQLVELSNEIGSRTLKFNEDM...  
 Rc 649 EEGILESLNCGSHFVELSNEIRSKSLTFNED-...  
 Vv 645 EECILESLKSRVHFPEFSSEIGGKSLTFNEDM...  
 Pt 666 EEGILENLNGGVHFVELSNEIGSKNLTFNED-...  
 Os 625 VESILENVNHGARLVELSNEDNVKRFTFNEDL...
