# Supplementary material for: Mutation of an Arabidopsis NatB N-Alpha-Terminal Acetylation Complex Component Causes Pleiotropic Developmental Defects
Source: PubMed Central journal article supplement (PMC3828409; doi:10.1371/journal.pone.0080697), 2013-11-14

At5g58450 247823\_at

Arabidopsis eFP Browser at bar.utoronto.ca  
 Winter et al., 2007. PLoS One 2(8): e718

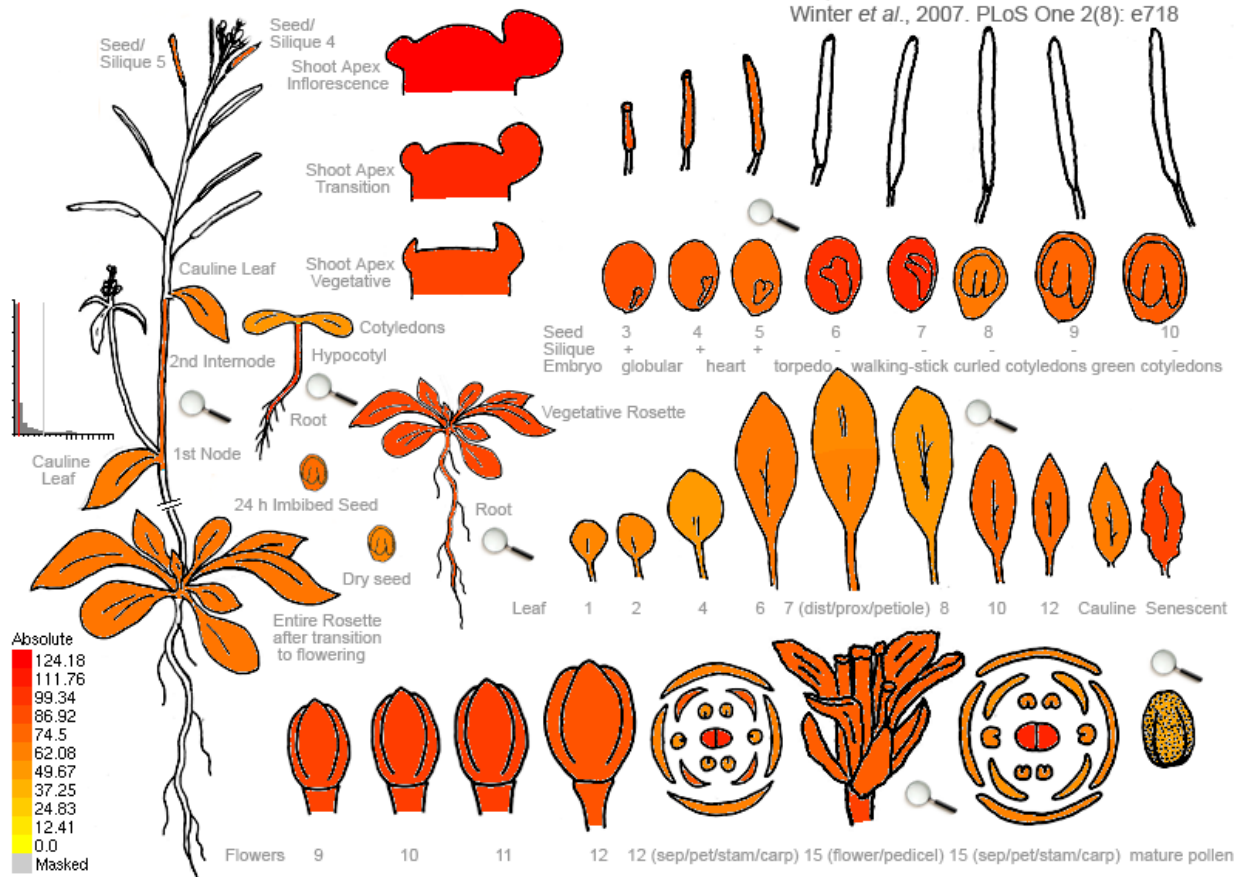

Supplement: pone.0080697.s006.pdf [file pone.0080697.s006.pdf]
