# Supplementary material for: Mutation of an Arabidopsis NatB N-Alpha-Terminal Acetylation Complex Component Causes Pleiotropic Developmental Defects
Source: PubMed Central journal article supplement (PMC3828409; doi:10.1371/journal.pone.0080697), 2013-11-14

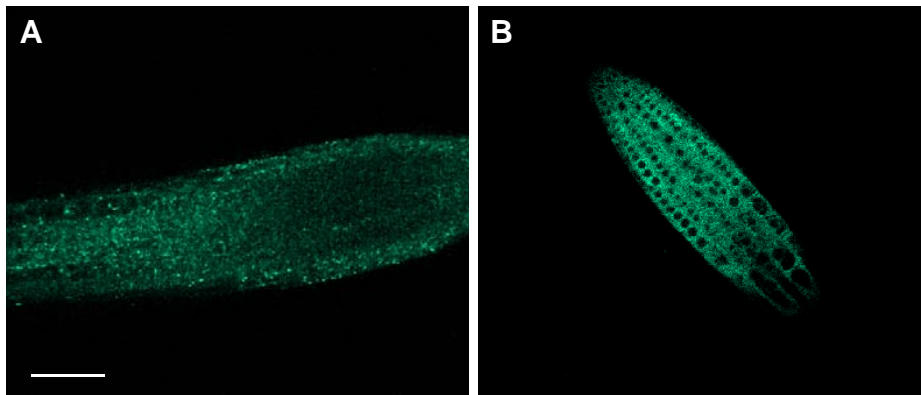

Supplement: pone.0080697.s008.pdf [file pone.0080697.s008.pdf]
