# Supplementary material for: Mutation of an Arabidopsis NatB N-Alpha-Terminal Acetylation Complex Component Causes Pleiotropic Developmental Defects
Source: PubMed Central journal article supplement (PMC3828409; doi:10.1371/journal.pone.0080697), 2013-11-14
Supplement: pone.0080697.s010.pdf [file pone.0080697.s010.pdf]

**Table S1.-** Oligonucleotide sets used for the fine mapping of *TCU2*

| Marker    |        | Oligonucleotide sequences (5'→3') |                           | PCR product size (pb) |       |
|-----------|--------|-----------------------------------|---------------------------|-----------------------|-------|
| Name      | Type   | Forward primer                    | Reverse primer            | Ler                   | Col-0 |
| CER456965 | In/Del | GGTTCTGTCTAGGTACTGTC              | GTAAATGACACATATGGCGACAA   | 171                   | 185   |
| MTI20     | In/Del | ACGTAATAAGCCCTTGCAATAAG           | CCAGAGACAGTGGGGTAAGTC     | 194                   | 177   |
| K21L19    | In/Del | TTCACTAATCCTAATTGGGGTAG           | ATAGATCTCCGAACTCATCGTC    | 222                   | 226   |
| MCK7      | In/Del | TTACTTGTCTCTCATTTCGC              | TTGGCTGATTGAAAGAAATAAAAC  | 176                   | 202   |
| MQJ2      | In/Del | TGTTACACACCTTATGAGAACC            | AAGAATATCGATCGGTGGTAAC    | 224                   | 207   |
| MZN1      | In/Del | TTATATGAAACAGAGGAAATTTTCG         | CATCATATATAACTAAACAATCTAG | 181                   | 185   |
| K19M22    | In/Del | TTACTTGCTGCTATGGTCTTCG            | TGATTCAGCGATTGCAAGCGGC    | 174                   | 164   |
| MMN10     | In/Del | CGCGGTAATAAGCTGCAATAAT            | GATGTATGTTTCTCTGTCTCTG    | 337                   | 405   |
| MAF19     | SNP    | CGAATCAAATCGTCGGAGAGTA            | ACACATGAATCAGAACAAATCACA  | 631                   | 631   |
| MBK5      | SSLP   | CTGTCAGTTGTTGGTCAAAG              | TGAGCATTTTACAGAGACG*      | 360                   | 381   |
| MNA5      | SSLP   | TACAGAGAAAACATCTAACAGTC           | AAAAGTCCCAACTCCAATACC     | 168                   | 142   |

\*Labeled with HEX (4,7,2',4',5',7'-hexachloro-6-fluorescein).
