# Supplementary material for: Mutation of an Arabidopsis NatB N-Alpha-Terminal Acetylation Complex Component Causes Pleiotropic Developmental Defects
Source: PubMed Central journal article supplement (PMC3828409; doi:10.1371/journal.pone.0080697), 2013-11-14
Supplement: pone.0080697.s011.pdf [file pone.0080697.s011.pdf]

**Table S2.-** Other oligonucleotide sets used in this work

| Purpose                   | Template     | Oligonucleotide sequences (5' → 3') |                          |
|---------------------------|--------------|-------------------------------------|--------------------------|
| Candidate gene sequencing | <i>AGO10</i> | TTCAAGATTAGCAAACAGTATCTG            | CCACTAACAGTACCGCGAAC     |
|                           | <i>AGO10</i> | AACAACAACATTTTTACTTCACTG            | CAGTGTAAGACTTTTCCGGC     |
|                           | <i>AGO10</i> | GTGTCATCAAAGAGTGTTAACAG             | ACTGACTTCATAGTACAGTTCTC  |
|                           | <i>AGO10</i> | GAAGGAAATACCGTGTTCGGG               | TTTCTCGACTTGATCGGGCC     |
|                           | <i>AGO10</i> | TCATTTAGAAAAGCAACAGGGC              | AAACATTGGTAAATCTAAAGCCG  |
|                           | At5g58420    | ACCCATAAATCCCAGAACCCG               | ATGAAACCAGCAGGGTAGGTC    |
|                           | At5g58420    | CATCTGAAGAGGCTTAATGCG               | TAGTAAAAACAAGAGAGGACAC   |
|                           | At5g58430    | ATTTTCAAACAACGCGGCCAGG              | ACTTTAAACAATCTCTCAGGCG   |
|                           | At5g58430    | GTTTCCTAGCGAACGTAGACTC              | ACAATGACAAAAAAGTGATCCAG  |
|                           | At5g58440    | CCATAGTCCCCACCTGCGC                 | TCCTTGAATAATCTCAGCAGATC  |
|                           | At5g58440    | GTGTTTCTCAGGTGCAAGGG                | TTGTCACCACCAAATACCTTCG   |
|                           | At5g58440    | GATGATGGCTGTCCAAGGCG                | GGAACAATGGGTATGAGGGC     |
|                           | At5g58450    | GTTGGAGAGTGTTGACATGGC               | AATCTTCTTTTATACGTGTGCAC  |
|                           | At5g58450    | GGAAAACAGATGAGGCACTCTC              | GATATAGAAACAATCGAATGACC  |
|                           | At5g58450    | ACACAAACTCTCTCACTTTAAGC             | CTTAGAAAGAGAAAGATTTTGGC  |
|                           | At5g58450    | GGCTTCCTACAGACGGTGTG                | TCCTCAAAGCTGTCTGCGTTC    |
|                           | At5g58450    | CCATATCCCTGTGGGCAACC                | CTGAACCAAGACCTGGACATC    |
|                           | At5g58450    | ACTGGCATGTGTTGAACTCCC               | AGTGAGAAACCAGATGGGTGG    |
|                           | At5g58460    | ATCAATCATGGATCTATCGCC               | AAACAAGCGGCCATGATAGC     |
|                           | At5g58460    | ATAGGAAAGTTCGCCATGTCAG              | GTTTAAATGCGCTCTGCACTTG   |
|                           | At5g58460    | TCTGTATTCGCAATTCAGCTAG              | CAAAACAATCCCCAATAATACAG  |
|                           | At5g58465    | CTTGCTAACCGGTGACTAGC                | TTACATGCAAATAATAAATTACCC |
|                           | At5g58470    | ATAAAGTTCCACTATTTTTGAGAG            | TTCCCTCTGACTACCACTACC    |
|                           | At5g58470    | TAGAAACGATAGTGGTAGGAGC              | CTCTGGTCAAAGGTAGGAGC     |
|                           | At5g58470    | TCTGCAGGCGGCTTTTTCAAC               | ATATGGACGAGACCGGTTTCC    |

**Table S2.-** Other oligonucleotide sets used in this work

| Purpose                   | Template  | Oligonucleotide sequences (5' → 3') |                            |
|---------------------------|-----------|-------------------------------------|----------------------------|
| Candidate gene sequencing | At5g58470 | TAGAGGAGGAGGAGGTGGTG                | CTTGGGATTTTCGGCATTAGTC     |
|                           | At5g58480 | ATAACAGTGAGATGCTGAGTCG              | ATAATCATCTAACCTTTACGAAGG   |
|                           | At5g58480 | TTATGGAATGTGAATGAGTCGG              | ATAATCATCTAACCTTTACGAAGG   |
|                           | At5g58490 | GAGGAGGAGGAGAAACAGCC                | GTCTTCGACAGTGGATACCAC      |
|                           | At5g58490 | CCAAGTCCCAACTGGCCTGC                | CAAACCTTTAAAGAAAAATCTCAGAG |
|                           | At5g58495 | CTATCCCAATTACAATGTCCCC              | AAAAACAATAATAATAGTGGGTGG   |
|                           | At5g58500 | AACTTGTTGCTTCTGACTTGTG              | CGTTAGACCCGAGACTTCGC       |
|                           | At5g58530 | CACTTTTTTATTAACCAGCCCTC             | TAATGATTTGTTTTTCTTCGACG    |
|                           | At5g58570 | TCGTTATGGGAGCCACACG                 | TTACATCGAGGATAGCGGGG       |
|                           | At5g58600 | CCTTCACATCTTTAGCAATGTTG             | GTGAAAGACCAGAAATCAAACAC    |
|                           | At5g58600 | ATTGGTAATGAGGTTGATTTTCG             | AGTTTCGACCCAATACGCC        |
|                           | At5g58600 | CTTATTACCAAGACATGGACCG              | CTTTTTTCCAATAAGCCCATCG     |
|                           | At5g58650 | CCGCCTTCTAGCTGACACG                 | GCTGGAACCTTCCGTGAAG        |
|                           | At5g58670 | CAACGGTTCTGTTTCAGTCAG               | AATGATCCCCCAAACGTCTTAC     |
|                           | At5g58670 | CTGCAGAAATGTCTTAACGTGG              | ATCTAAAGGAAAGTCCATATTCC    |
|                           | At5g58670 | CTGCAGAAATGTCTTAACGTGG              | GTCATACGTTTCATAATTTGCTG    |
|                           | At5g58680 | TTCTCTCTTCTCTGCAGTTGC               | TGTCTTGTTAGTTCTATAGGG      |
|                           | At5g58680 | ATGATTGTTTCTCCGGTGCGG               | TGTCTTGTTAGTTCTATAGGG      |
|                           | At5g58700 | TAGTATGTTATTTATGGGGAGGG             | CTTTGATCAAATAAATTTAGGCC    |
|                           | At5g58700 | TAAAGATTGAGATTGAAAGATTACG           | CAAATGTCTGAGTTATCATCTGC    |
|                           | At5g58700 | CAGTTTAAAGTTGCTAAGGTTTTTC           | TCTGCCATACCCCTACATTTAC     |
|                           | At5g58700 | ATTTGCGTATCGTCATCCAGG               | TAAGATGAGAGATGCTTATTAATG   |
|                           | At5g58740 | GTTAGAAACGGAGTGTACCTC               | TCTTCTTGAAACCTCTGGAGC      |
|                           | At5g58740 | GCACATTACCCTGCAGAAGAG               | CTCAGTGGACTTTTAGTAGATG     |
|                           | At5g58750 | GTTGCTTCGTTATGCTACATCG              | GAATCAGAGCCATCTATGTAAC     |

**Table S2.-** Other oligonucleotide sets used in this work

| Purpose                   | Template    | Oligonucleotide sequences (5' → 3')                                       |                                                                             |
|---------------------------|-------------|---------------------------------------------------------------------------|-----------------------------------------------------------------------------|
| Candidate gene sequencing | At5g58750   | AGAAGATCACTCGTAGTTCCG                                                     | CATTCACATTTGTTCCGGACGCG                                                     |
|                           | At5g58760   | CGTGAATGGTGCTTCCGGCC                                                      | TGCACAATGAACCTTGATCCGGG                                                     |
|                           | At5g58760   | ACTCCAACCGAGAATTCCTCC                                                     | CTACTCGTTTGTGTGCAAGATC                                                      |
|                           | At5g58760   | GAGCTTCTTCTCAGTTGTGGG                                                     | AAAAAAGAAGCAAAATTGCCGCC                                                     |
|                           | At5g58770   | ATCATCTTCTTCCACACCGAC                                                     | CTCAACTTCGATTTCCGCCATC                                                      |
|                           | At5g58770   | ATCATCTTCTTCCACACCGAC                                                     | CCTGGTTTCGTATCAGCGCC                                                        |
|                           | At5g58780   | TACAAGTTTAATACGTACGGCC                                                    | CTCAATTGAGTTGTACTTTATAACC                                                   |
|                           | At5g58780   | TACAAGTTTAATACGTACGGCC                                                    | ATTTGTTTTAGTGATAAGTAACGAC                                                   |
|                           | At5g58782   | AAGGTTTCCAAAACACTGCGAGAG                                                  | GATTATCTTTGTCCAGCTCAAAG                                                     |
|                           | At5g58784   | AATACGATGATGAGGAAGAAAGG                                                   | TTTTGTGTTGATTGAGCCAGCC                                                      |
|                           | At5g58800   | CATTTGTTTGACTAAATTATCCC                                                   | TAATGATGTAGAGGATAAATAGGG                                                    |
|                           | At5g58800   | CAAAGAGTTTTTGTGTCAGTAAC                                                   | TAATGATGTAGAGGATAAATAGGG                                                    |
|                           | <i>FAS2</i> | AAACCATATACGAACACTAATAAG                                                  | GATCCATCAGGTGACCATGAC                                                       |
|                           | <i>FAS2</i> | AGCTATGGTTGATAAATTCGGG                                                    | GATCCATCAGGTGACCATGAC                                                       |
|                           | <i>FAS2</i> | TATTTCTGGCTCAGTGGACAAC                                                    | GGTGTGTTTCTGTCAATTAGTTC                                                     |
|                           | <i>FAS2</i> | CGTCTTTCTTTCGAAGATTGTC                                                    | GTAAAGATCAACACAACATCCC                                                      |
| GUS assays                | <i>TCU2</i> | <i>GGGGACAAGTTTGTACAAAAAAGCAGGCTCCCATCCA</i><br>ACATCCGAGAGG <sup>a</sup> | <i>GGGGACCACTTTGTACAAGAAAGCTGGGTACATCAAAAG</i><br>ACTCGGTTCCAG <sup>b</sup> |
|                           | pMDC164     | AAGACTGTAACCACGCGTCTG                                                     | TTGACTGCCTCTTCGCTGTAC                                                       |
| Subcellular localization  | <i>TCU2</i> | <i>GGGGACAAGTTTGTACAAAAAAGCAGGCTATGCGCA</i><br>GGTGGGGACTATG <sup>a</sup> | <i>GGGGACCACTTTGTACAAGAAAGCTGGGTAACATGGGAC</i><br>ATCTGTTGCTTG <sup>b</sup> |
|                           | pMDC85      | TTCATTTGGAGAGGACCTCG                                                      | TATGTTGCATCACCTTCACCCT                                                      |

<sup>a,b</sup>These oligonucleotides include at their 5' ends the <sup>a</sup>attB1 and <sup>b</sup>attB2 sequences, which are shown in italics.
